# Supplementary material for: Treatment of Group A Beta-Hemolytic Streptococcal tonsillopharyngitis: Cephalosporins Versus Penicillins
Source: MDPI journal article supplement (doi:10.3390/v13112234), 2009-01-01
Supplement: s1 [file s1]

**Supplementary Figure S1.** PRISMA flow diagram for selection of studies on miRNA in cervical cancer (according to [1]).

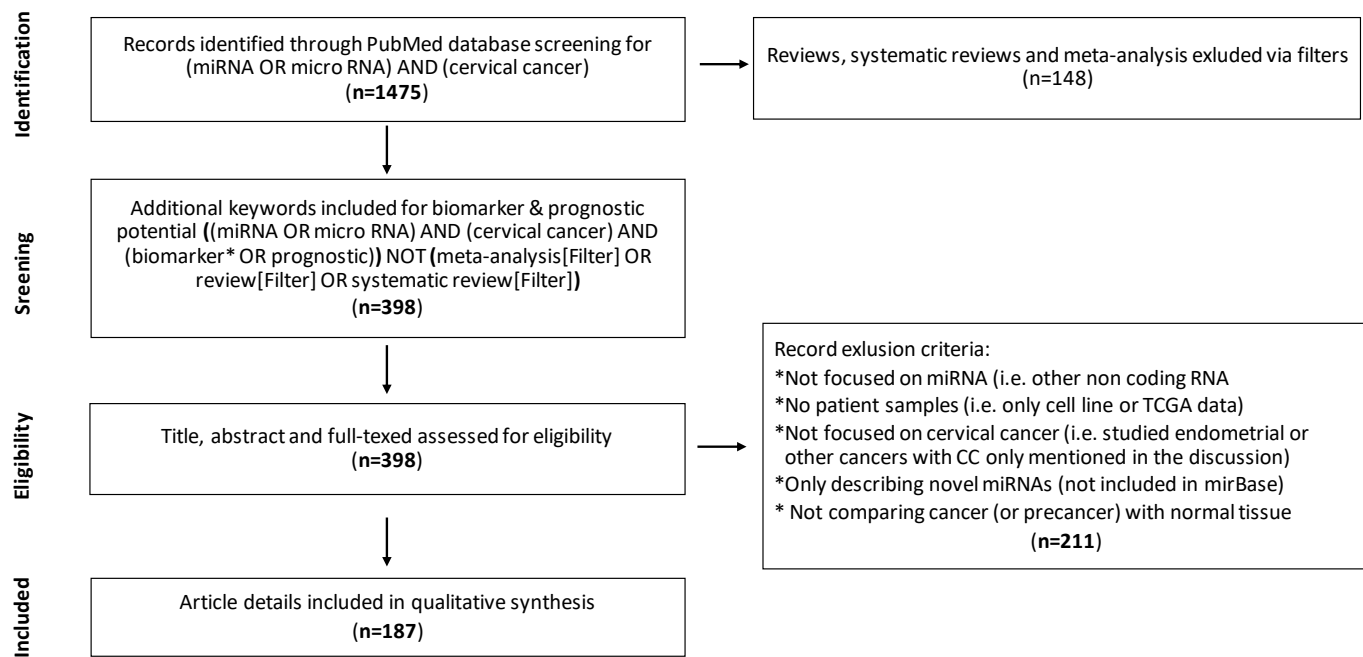

## Reference

1. Page MJ, Moher D, Bossuyt PM, Boutron I, Hoffmann TC, Mulrow CD, et al. PRISMA 2020 explanation and elaboration: updated guidance and exemplars for reporting systematic reviews. *BMJ*. 2021 Mar 29;372:n160.
